# Supplementary material for: Cholinergic Basal Forebrain Atrophy Accelerates Cognitive Decline via Cortical Thinning: The Moderating Role of Amyloid-β Pathology in Preclinical Alzheimer’s Disease
Source: Research Square preprint supplement (doi:10.21203/rs.3.rs-6220536/v1), 2026-05-25
Supplement: Supplementary file 1 [file 0c2fc87a9d629518a5c21e32.docx]

**SUPPLEMENTAL MATERIAL: TABLE OF CONTENTS**

**Supplemental Figure 1. Longitudinal vertex-wise cortical thickness changes in all subjects**

**Supplemental Table 1. Longitudinal cBF volume changes in all subjects, Aβ+ and Aβ− groups**

**Supplemental Table 2. Longitudinal PACC5 score changes in all subjects, Aβ+ and Aβ− groups**

**Supplemental Figure 2. Associations between vertex-wise slopes of cortical thickness change and the slope of PACC5 score change in the Aβ+ group**

**Supplemental Figure 3. Mediation analysis of the associations between cBF degeneration, cortical thinning, and cognitive decline in the Aβ+ group**

**Supplemental Figure 4. Associations between vertex-wise slopes of cortical thickness change and the slope of PACC5 score change in the Aβ− group**

**Supplemental Figure 5. Mediation analysis of the associations between cBF degeneration, cortical thinning, and cognitive decline in the Aβ− group**

**Supplemental Figure 1. Longitudinal change in vertex-wise cortical thickness in all participants.**

This figure depicts the regional outcomes of vertex-wise analyses concerning changes in cortical thickness during the initial follow-up years for all patients. The analyses of cortical thickness were adjusted for age, sex, and years of education following a harmonization process. Regions depicted in blue indicate areas of reduced cortical thickness. Only the clusters that survived family-wise error correction *P* < 0.05 are shown.

**Supplemental Table 1. Longitudinal cBF volume changes in all subjects, Aβ+ and Aβ- groups**

**Supplemental Table 2. Longitudinal PACC5 score changes in all subjects, Aβ+ and Aβ- groups**

**Supplemental Figure 2. Associations between vertex-wise slopes of cortical thickness change and the slope of PACC5 score change in the Aβ+ group.**

The brain renderings illustrate cortical clusters that exhibit significant correlations between vertex-wise slopes of cortical thickness changes and the slope of changes in the PACC5 score. The analyses of cortical thickness were adjusted for age, sex, and years of education following a harmonization process. The vertex-wise regression analyses were confined to cortical regions demonstrating significant associations with cBF degeneration. Only the clusters that survived family-wise error correction *P* < 0.05 are shown.

**Supplemental Figure 3. Mediation analysis of the associations between cBF degeneration, cortical thinning, and cognitive decline in the Aβ+ group.**

**A.** The individual slopes of change in cBF volume (y-axis) are depicted against the individual slopes of change in the PACC5 score (x-axis), with the blue line indicating the linear trend. **B.** The average individual slopes of change in cognitive-related cortical thickness (x-axis) are illustrated in relation to the individual slopes of change in the PACC5 score (y-axis), with the purple line denoting the linear trend. **C.** The individual slopes of change in cBF volume (x-axis) are presented against the average individual slopes of change in cognitive-related cortical thickness (y-axis), with the orange line representing the linear trend. **D.** The path diagram of the causal mediation model illustrates the effect of cBF degeneration on cognitive performance decline in path Z (orange arrow), the effect of cBF degeneration on cortical thinning in path X (blue arrow), and the effect of cortical thinning on cognitive performance in path Y (purple arrow). The beta coefficients [95% confidence intervals] and *P*-values from the regression analyses are provided for each association separately. The total effect of association Z is composed of the sum of the average direct effect (ZADE) and the average causal mediation effect (ZACME).

**Supplemental Figure 4. Associations between vertex-wise slopes of cortical thickness change and the slope of PACC5 score change in the Aβ− group.**

The brain renderings illustrate cortical clusters that exhibit significant correlations between vertex-wise slopes of cortical thickness changes and the slope of changes in the PACC5 score. The analyses of cortical thickness were adjusted for age, sex, and years of education following a harmonization process. The vertex-wise regression analyses were confined to cortical regions demonstrating significant associations with cBF degeneration. Only the clusters that survived family-wise error correction *P* < 0.05 are shown.

**Supplemental Figure 5. Mediation analysis of the associations between cBF degeneration, cortical thinning, and cognitive decline in the Aβ− group.**

**A.** The individual slopes of change in cBF volume (y-axis) are depicted against the individual slopes of change in the PACC5 score (x-axis), with the blue line indicating the linear trend. **B.** The average individual slopes of change in cognitive-related cortical thickness (x-axis) are illustrated in relation to the individual slopes of change in the PACC5 score (y-axis), with the purple line denoting the linear trend. **C.** The individual slopes of change in cBF volume (x-axis) are presented against the average individual slopes of change in cognitive-related cortical thickness (y-axis), with the orange line representing the linear trend. **D.** The path diagram of the causal mediation model illustrates the effect of cBF degeneration on cognitive performance decline in path Z (orange arrow), the effect of cBF degeneration on cortical thinning in path X (blue arrow), and the effect of cortical thinning on cognitive performance in path Y (purple arrow). The beta coefficients [95% confidence intervals] and P-values from the regression analyses are provided for each association separately. The total effect of association Z is composed of the sum of the average direct effect (ZADE) and the average causal mediation effect (ZACME).
