# Supplementary material for: Cholinergic Basal Forebrain Atrophy Accelerates Cognitive Decline via Cortical Thinning: The Moderating Role of Amyloid-β Pathology in Preclinical Alzheimer’s Disease
Source: Research Square preprint supplement (doi:10.21203/rs.3.rs-6220536/v1), 2026-05-25
Supplement: Supplementary file 2 [file 0e5d2e51761ddb9336d55732.docx]

| **cBF Volume** | ***Estimate*** | ***CI*** | ***T*** | ***P*** |
| --- | --- | --- | --- | --- |
| All Patients | -4.49 | [-5.43, -3.55] | -7.10 | **＜0.001** |
| Aβ+ | -5.93 | [-8.21, -3.66] | -5.15 | **＜0.001** |
| Aβ- | -3.89 | [-4.96, -2.81] | -7.10 | **＜0.001** |
