# Supplementary material for: Cholinergic Basal Forebrain Atrophy Accelerates Cognitive Decline via Cortical Thinning: The Moderating Role of Amyloid-β Pathology in Preclinical Alzheimer’s Disease
Source: Research Square preprint supplement (doi:10.21203/rs.3.rs-6220536/v1), 2026-05-25
Supplement: Supplementary file 3 [file 7034262a2dfd50026acc3bdb.docx]

| **Characteristic** | **All participants**  **(n=230)** | **PiBN(-)**  **(n=169)** | **PiBP(+)**  **(n=61)** | ***p* value** |
| --- | --- | --- | --- | --- |
| **No. (% of sample)** |  |  |  |  |
| Female, no. (%) | 135(58.7%) | 101(59.8%) | 34(55.7%) | 0.692 |
| White/non-hispanic, no. (%) | 195(84.8%) | 142(84.0%) | 53(86.9%) | 0.815 |
| APOE-ε4+ | 64(27.8%) | 28(16.6%) | 36(59.0%) | ＜0.001 |
| CDR = 0.5 | 3（1.3%) | 2(1.2%) | 1(1.6 %) | 1 |
| **Mean (SD)** |  |  |  |  |
| Age, years | 73.4（6.12） | 72.9(6.32) | 74.7（5.37） | 0.0432 |
| Years of education | 16.0(2.99) | 15.9（3.09） | 16.6（2.64） | 0.0855 |
| MMSE | 29.1(1.05) | 29.1(1.05) | 28.8(1.04) | 0.0609 |
| **PACC5** | 0.0521(0.633) | 0.0715(0.649) | -0.001786(0.590) | 0.42 |
| MMSE_Z | 0.0355 (0.968) | 0.107(0.966) | -0.163(0.953) | 0.0609 |
| CAT3_Z | 0.0784 (1.00) | 0.0567(1.01) | 0.139(0.979) | 0.58 |
| DigitSym_Z | 0.0943 (0.928) | 0.125(0.959) | 0.0103(0.836) | 0.381 |
| LogicMem_DR_Z | 0.0187 (0.989) | -0.00478(0.991) | 0.0836(0.988) | 0.551 |
| FCsrt96_Z | 0.0289 (0.963) | 0.0749(0.952) | -0.119(0.994) | 0.227 |
| PIB-FLR DVR | 1.18(0.193) | 1.08(0.0511) | 1.45(0.167) | ＜0.001 |
| Adj_Basal Forebrain | 604(62.0) | 608(62.8) | 595(59.5) | 0.165 |
| ICV | 1480(157) | 1470(153) | 1510(167) | 0.0996 |
| **Follow-up MRI scans** |  |  |  |  |
| Prospective MRI follow-up, years | 4.39(1.44) | 4.48(1.43) | 4.14(1.45) | 0.12 |
| No. follow-up MRI scans | 2.77(0.681) | 2.80(0.684) | 2.69(0.672) | 0.252 |
| **Follow-up cognitive assessments** |  |  |  |  |
| Prospective cognitive follow-up, years | 5.05(0.806) | 5.08(0.822) | 5.00(0.764) | 0.512 |
| No. follow-up cognitive assessments | 5.77(0.507) | 5.77(0.500) | 5.77(0.529) | 0.987 |

Table1. Participant information is presented for the full sample and at two levels of Aβ burden. Statistical differences between the Aβ+ and the Aβ− groups were computed using two-sample t tests or chi-square t tests, as appropriate. APOE: apolipoprotein, CDR: Clinical Dementia Rating, PIB-FLR: frontal, lateral temporo-parietal and retrosplenial composite PIB-PET, DVR: distribution volume ratio, MMSE: mini-mental state examination, PACC5: Preclinical Alzheimer Cognitive Composite-5, CAT3_Z: California Verbal Learning Test, Version 3, Z-score,DigitSym_Z: Digit Symbol Substitution Test Z-score,LogicMem_DR_Z: Logical Memory Delayed Recall Z-score,FCsrt96_Z: Free and Cued Selective Reminding Test 96, Z-score. SD standard deviation.
