# Supplementary material for: Cholinergic Basal Forebrain Atrophy Accelerates Cognitive Decline via Cortical Thinning: The Moderating Role of Amyloid-β Pathology in Preclinical Alzheimer’s Disease
Source: Research Square preprint supplement (doi:10.21203/rs.3.rs-6220536/v1), 2026-05-25
Supplement: Supplementary file 7 [file b41165cace5d71b2a069d4ee.docx]

| **PACC5 score** | ***Estimate*** | ***CI*** | ***T*** | ***P*** |
| --- | --- | --- | --- | --- |
| All Patients | -0.03 | [-0.04, -0.01] | -2.90 | **0.004** |
| Aβ+ | -0.11 | [-0.15, -0.06] | -4.50 | **＜0.001** |
| Aβ- | 0.003 | [-0.01, 0.02] | 0.48 | 0.635 |
