# Supplementary figures and images for: Cholinergic Basal Forebrain Atrophy Accelerates Cognitive Decline via Cortical Thinning: The Moderating Role of Amyloid-β Pathology in Preclinical Alzheimer’s Disease
Source: Research Square preprint supplement (doi:10.21203/rs.3.rs-6220536/v1), 2026-05-25

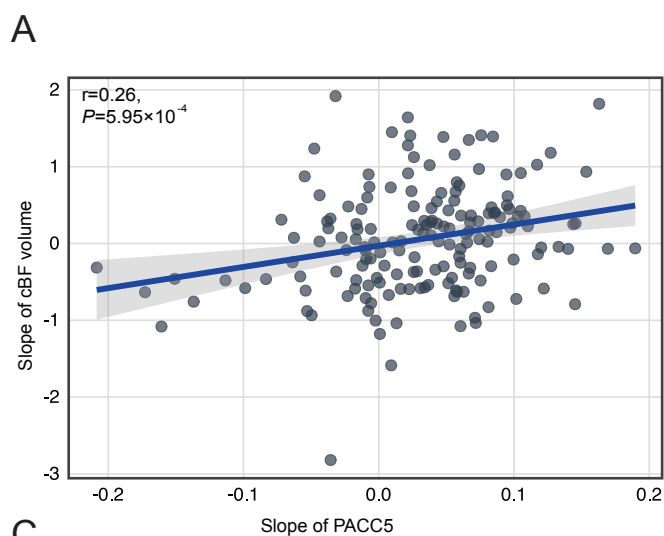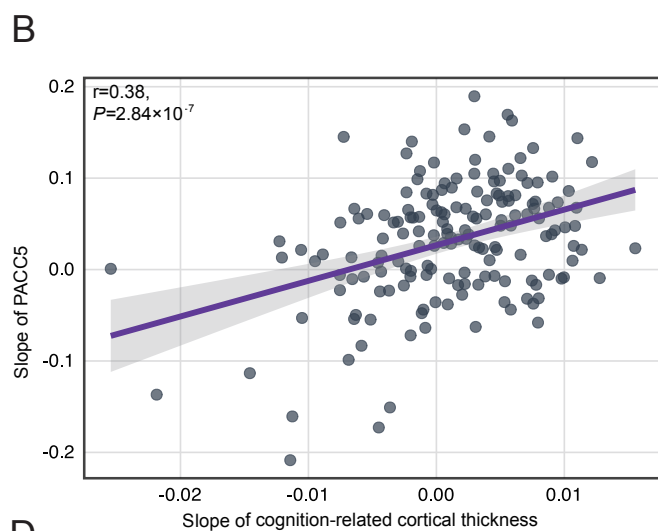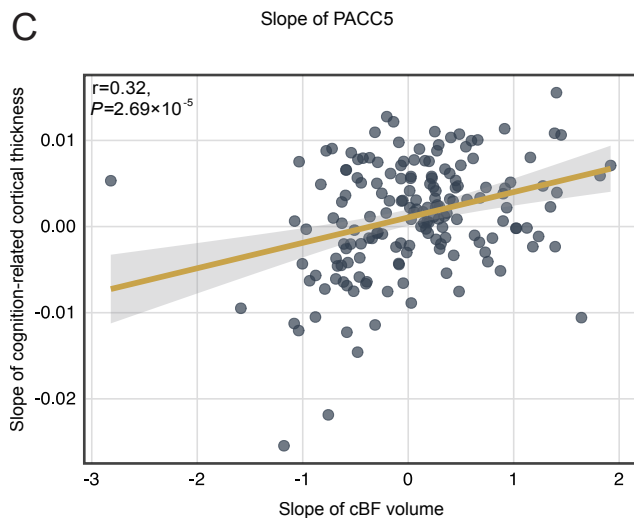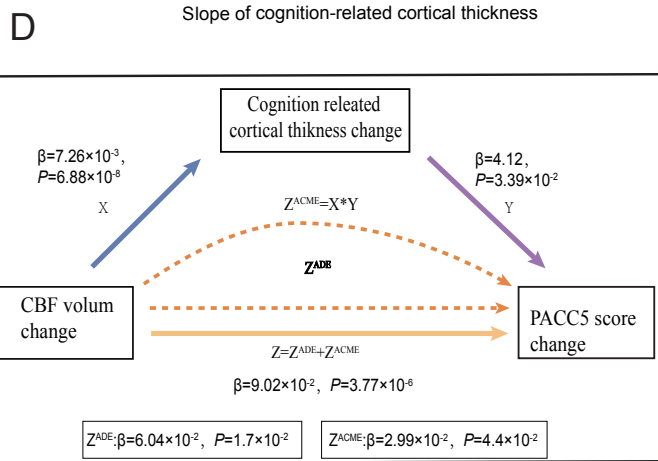

Supplement: Supplementary file 4 [file 80802f0279e6fff598d87ea4.pdf]

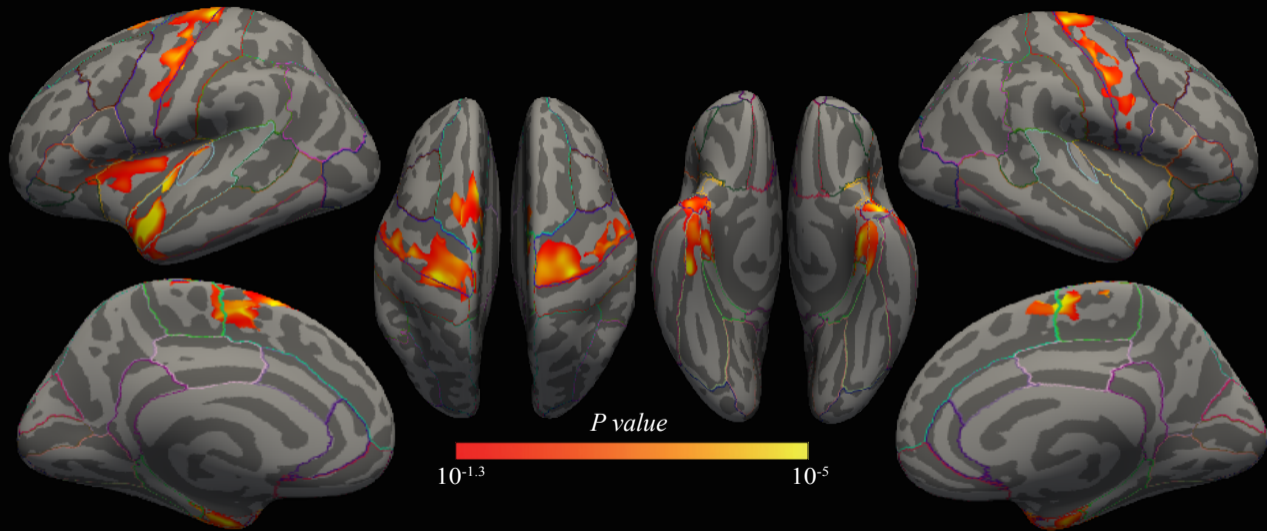

Supplement: Supplementary file 5 [file 83a068eee6412f5c3db7bd23.pdf]

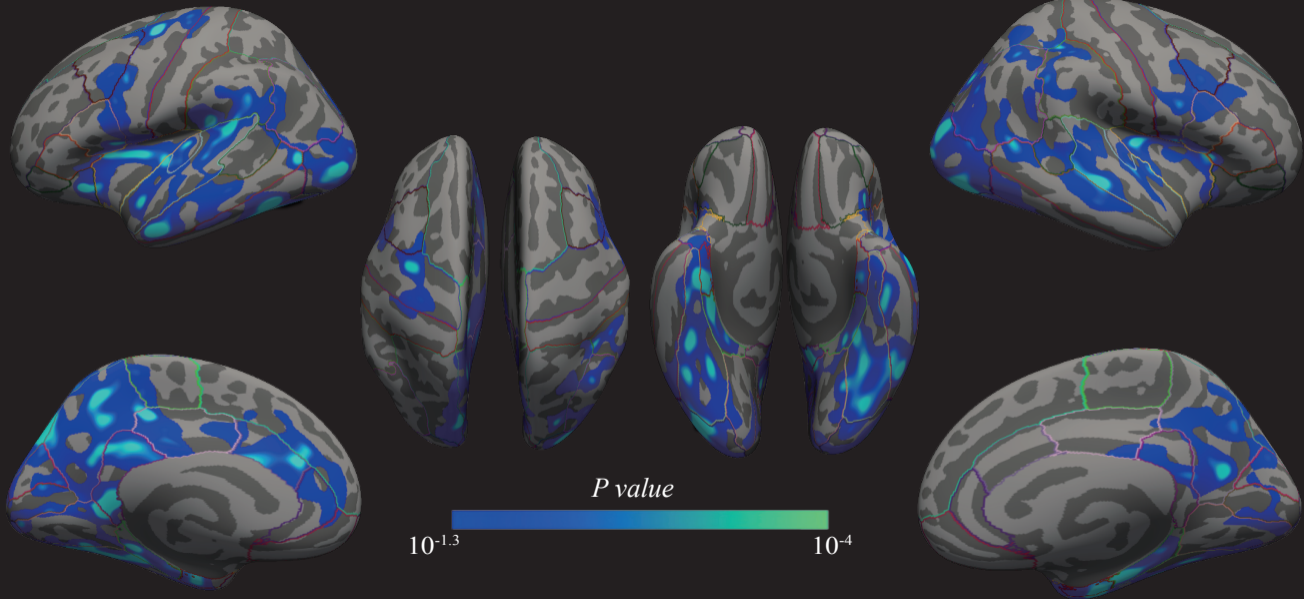

Supplement: Supplementary file 6 [file b2ff10fdaea9f0eaa4b0bf89.pdf]

A

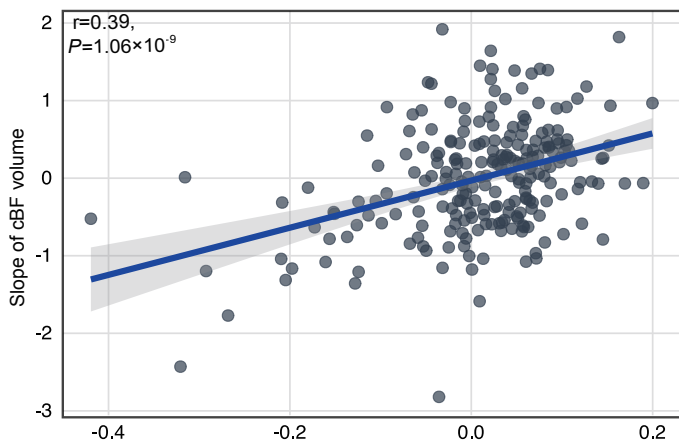

B

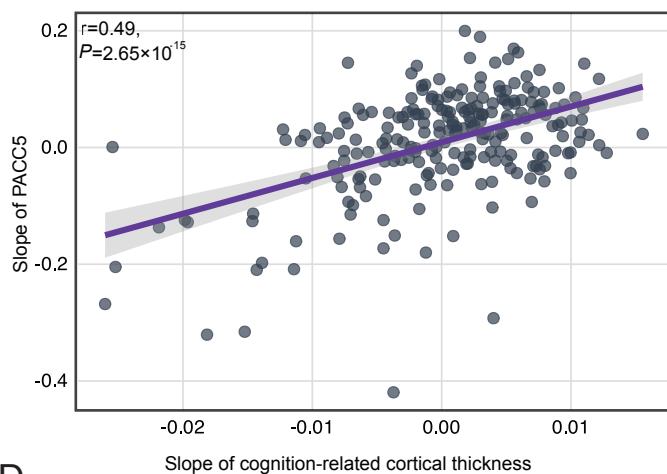

C

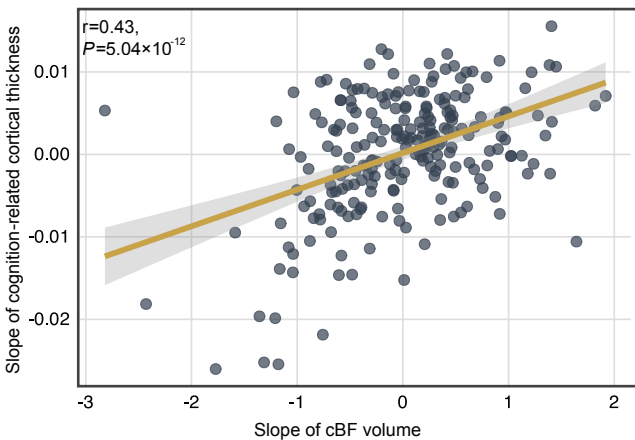

D

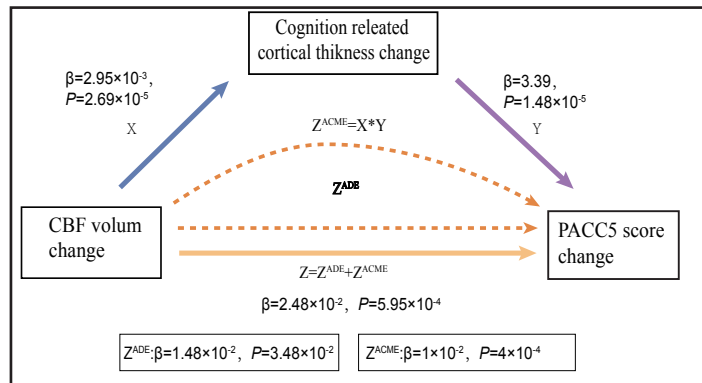

Supplement: Supplementary file 8 [file ce888e2adb6a20cbbbf23af6.pdf]
